# Supplementary material for: Colonization with Multidrug-Resistant Bacteria in the First Week of Life among Hospitalized Preterm Neonates in Serbia: Risk Factors and Outcomes
Source: MDPI journal article supplement (doi:10.3390/microorganisms9122613), 2021-12-17
Supplement: s1 [file s1]

**Table S1.** Characteristics of preterm neonates colonized with multidrug-resistant (MDR) bacteria within the first week of life

|                                               | Colonized at hospital admission |      | Colonized after hospital admission |      | Non-colonized  |      |
|-----------------------------------------------|---------------------------------|------|------------------------------------|------|----------------|------|
|                                               | N                               | %    | N                                  | %    | N              | %    |
| Total (N=103)                                 | 12                              | 11.6 | 49                                 | 47.6 | 42             | 40.8 |
| Sex (male)                                    | 9                               | 75   | 28                                 | 57.1 | 18             | 42.9 |
| Extremely preterm (<28 weeks of gestation)    | 1                               | 8.4  | 4                                  | 8.2  | 6              | 14.3 |
| Very preterm (28-32 weeks of gestation )      | 2                               | 16.6 | 19                                 | 38.8 | 20             | 47.6 |
| Late preterm (32-37 weeks of gestation )      | 9                               | 75   | 26                                 | 53   | 16             | 38.1 |
| Delivery by cesarean section                  | 10                              | 83   | 34                                 | 69.4 | 22             | 52.4 |
| Admission to the neonatal intensive care unit | 3                               | 25   | 25                                 | 51   | 23             | 55   |
| Mechanical ventilation                        | 3                               | 25   | 19                                 | 38.8 | 10             | 23.8 |
| Umbilical vein catheter                       | 4                               | 33.3 | 29                                 | 59.2 | 27             | 64.3 |
| Birth weight (g)                              | 1702.5 ± 343.3                  |      | 1683.2 ± 497.3                     |      | 1493.5 ± 498.8 |      |
| Age at admission (h)                          | 89.8 ± 58.7                     |      | 15.9 ± 19.7                        |      | 19.4 ± 30.3    |      |
| 1 <sup>st</sup> minute Apgar score            | 6.8 ± 1.9                       |      | 6.5 ± 1.7                          |      | 5.6 ± 2.3      |      |
